# Supplementary material
Source: PubMed Central journal article supplement (PMC5801111)

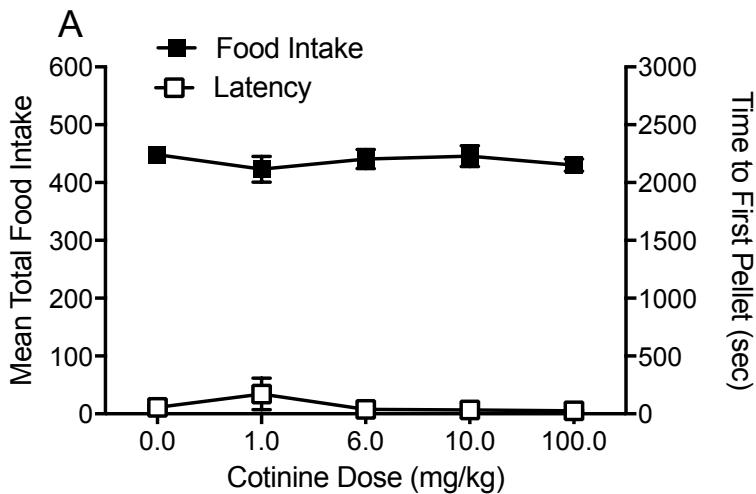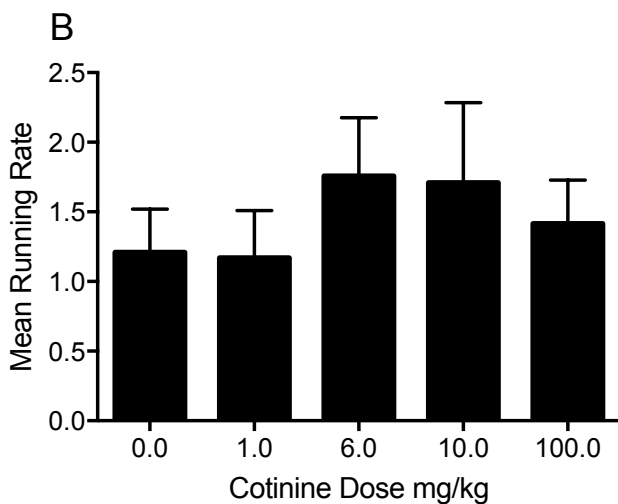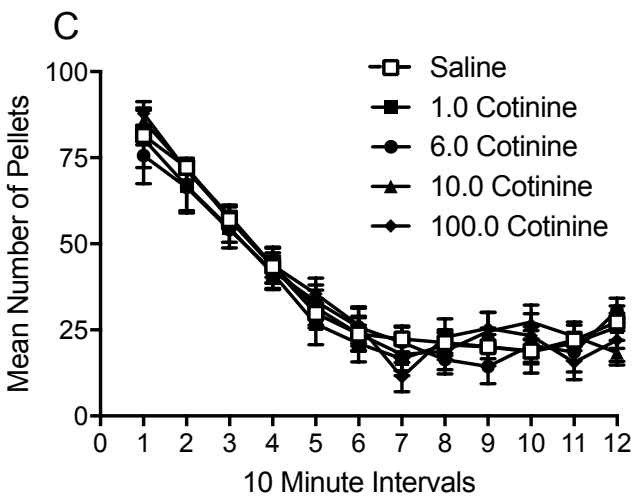

Supplement: NIHMS928473-supplement-1.pdf [file NIHMS928473-supplement-1.pdf]
